# Supplementary material
Source: publisher site journal article supplement (https://www.dovepress.com/article/315310)
Supplement: Supplementary file 1 [file get_supplementary_file.php]

**High-loading self-assembling peptide nanoparticles as a lipid-free carrier for hydrophobic general anesthetics**

Jing Liu1,2, Fei Peng1,2, Yi Kang1,2, Deying Gong1,2, Jing Fan1,2, Wensheng Zhang1,2**, Feng Qiu1,2*

1 Laboratory of Anesthesia and Critical Care Medicine, West China Hospital, Sichuan University, Chengdu, 610041, China

2 National-Local Joint Engineering Research Center of Translational Medicine of Anesthesiology, West China Hospital, Sichuan University, Chengdu, 610041, China

*Corresponding author: fengqiu@scu.edu.cn;

**Corresponding author: zhang_ws@scu.edu.cn

**Table S1. Sedation scoring criteria after tail vein injection in rats**

| **Score*** | **Behavior** |
| --- | --- |
| **0** | fully awake, normal activity |
| **1** | tend to stay close to the edge of the cage |
| **2** | backward balance disorder |
| **3** | ataxia |
| **4** | lay prone, unable to stand only rely on abdominals support |
| **5** | loss of the righting reflex |

*A score no less than 2 was considered effective sedation.

**Table S2. Pharmacodynamic data of lyophilized ET-GQY formulation (n=8)**

| **ED50 (mg/kg)** | **Onset time (min)** | **LORR duration (min)** | **Sedation duration (min)** |
| --- | --- | --- | --- |
| 0.75 (0.69-0.81) | 0.23±0.13 | 3.48±1.09 | 9.78±1.99 |


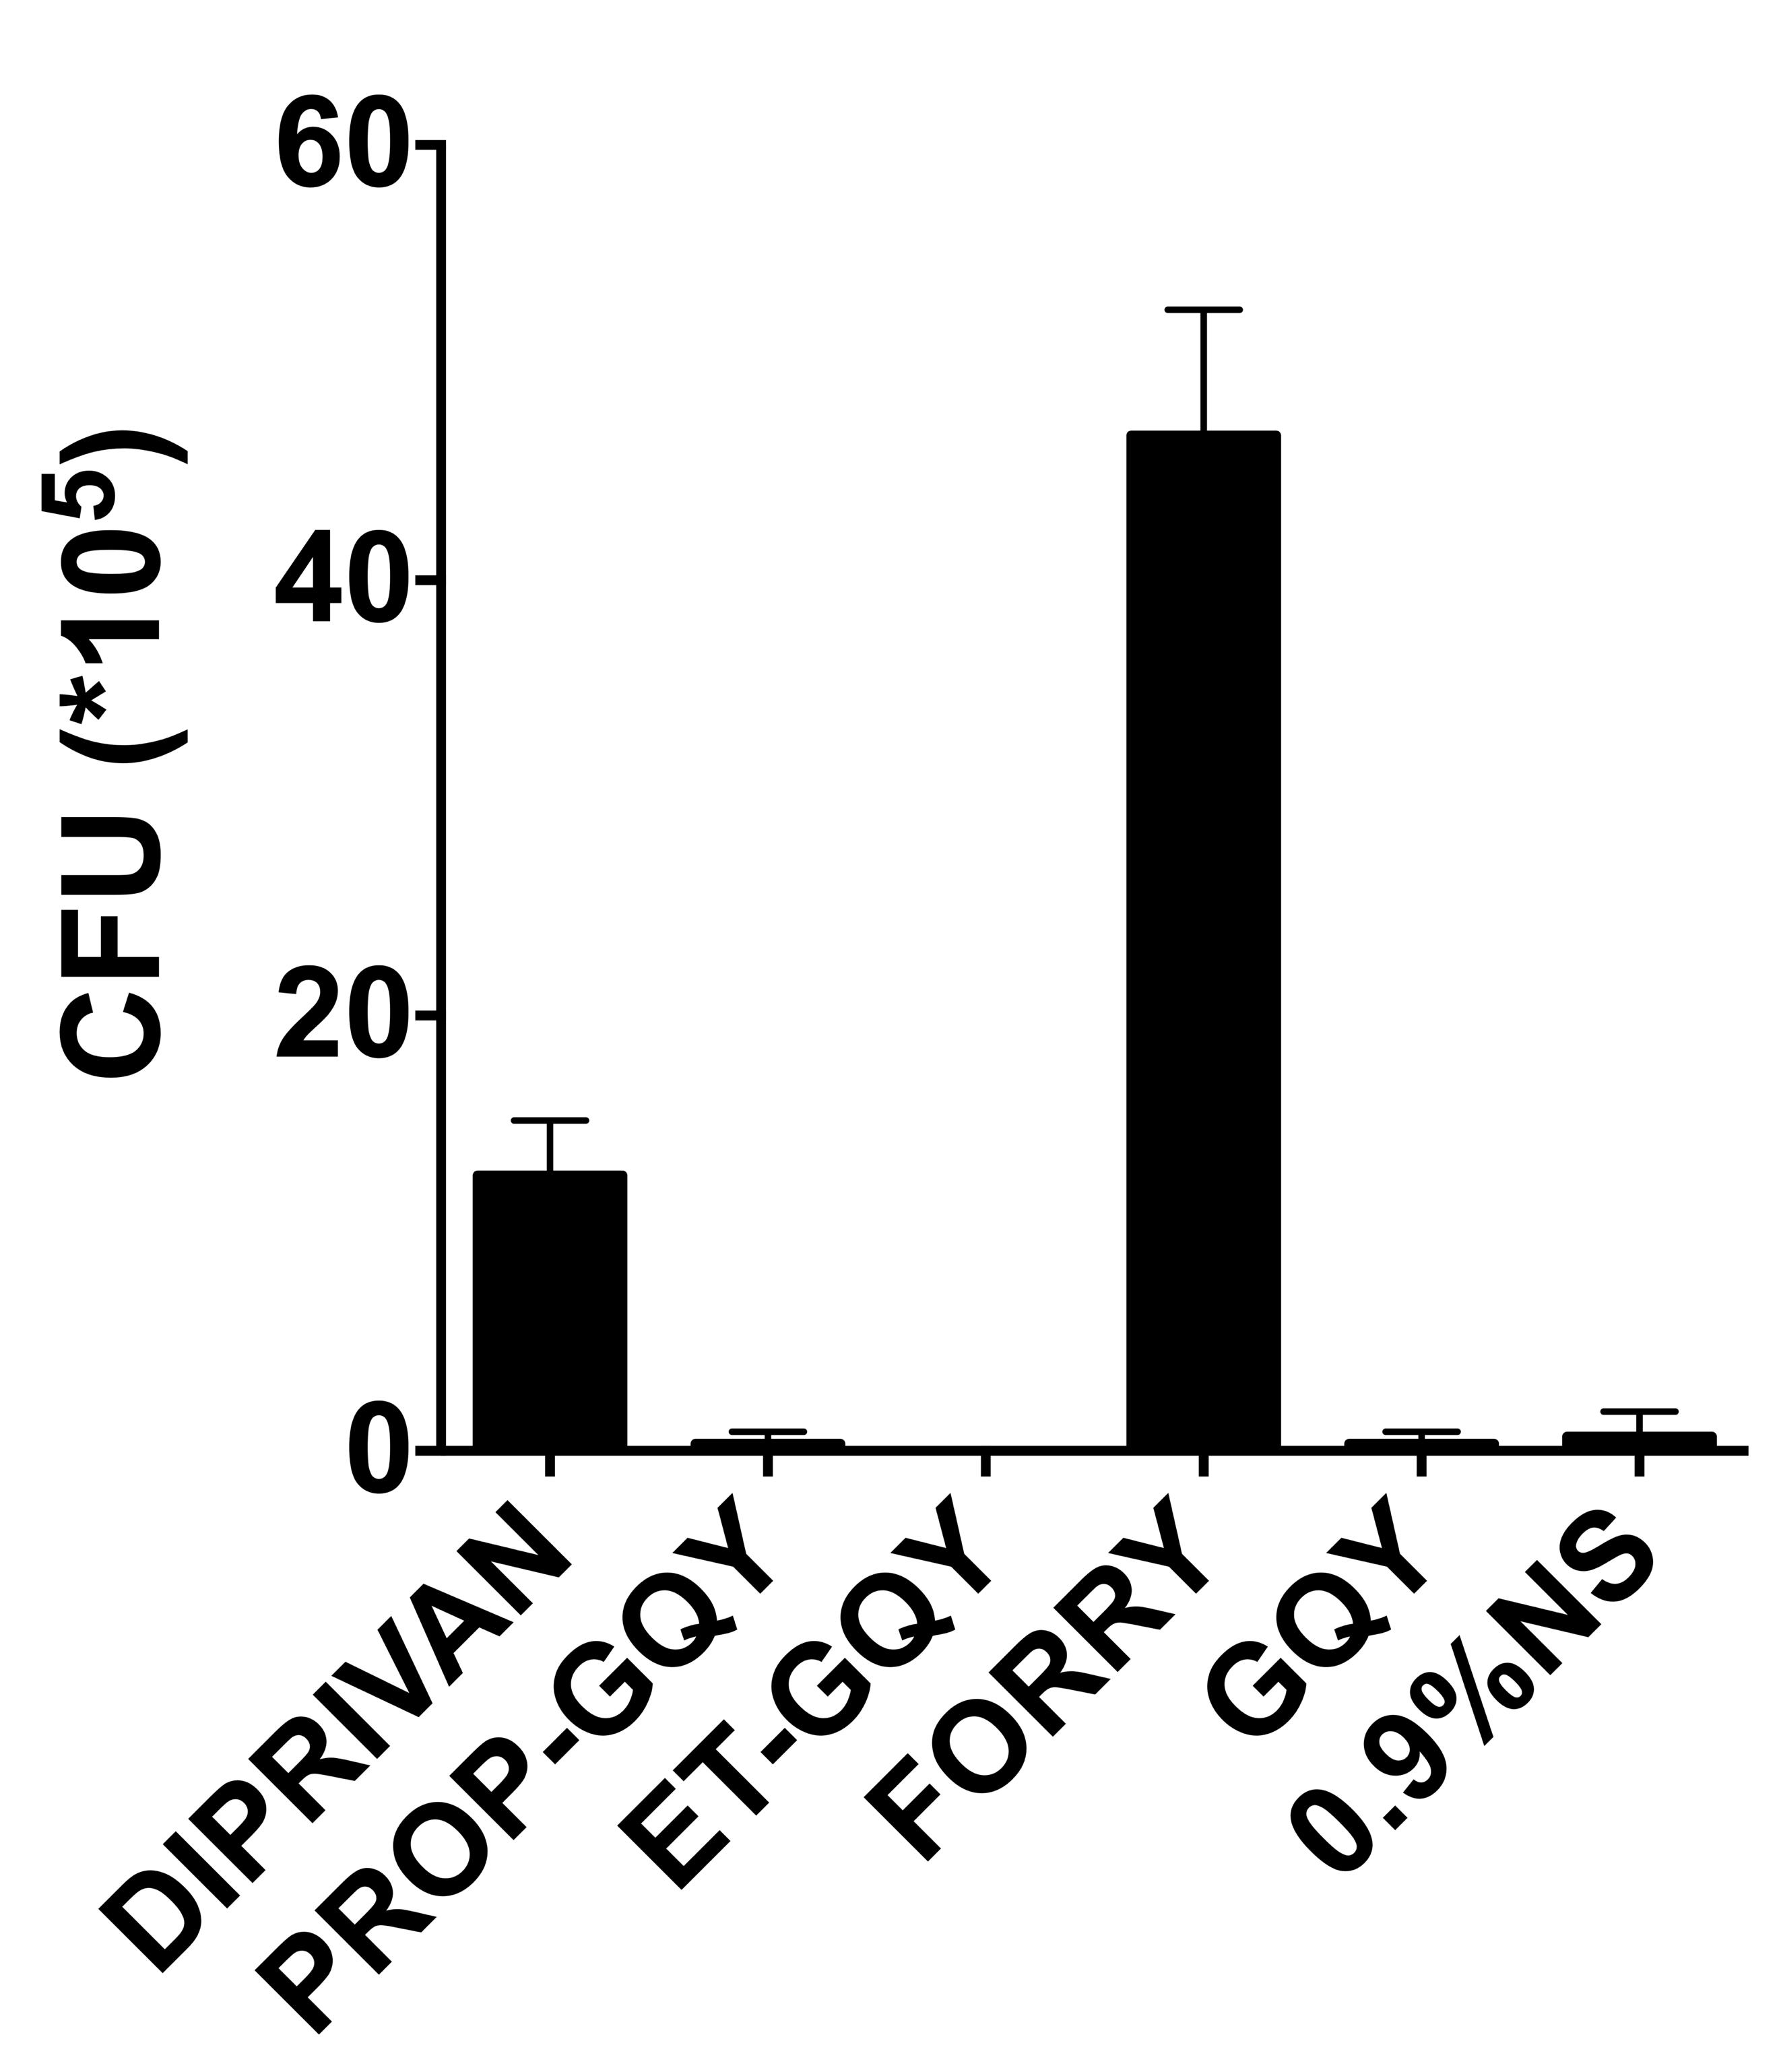


**Figure S1. Growth of *Staphylococcus Aureus* in different propofol and etomidate formulations.** Lipid-based DIPRIVAN and FORRY boosted bacterial growth while GQY-based formulations didn’t.
